# Supplementary material
Source: Research Square preprint supplement (doi:10.21203/rs.3.rs-8928274/v1)
Supplement: Supplementary file 1 [file 1e1996782a47feb4ab755490.docx]

**Interview Guide for Care Opinion Moderators**

Thank-you so much for taking the time to chat with me today. My name is ______ and I work at the University of Alberta. We were hired independently by Care Opinion Canada to evaluate the implementation of the program.

Because I work for the university, I always have to get people who are chatting with me to take a look at an information letter that describes what I will be asked and how it will be used, and to sign a consent form that says you’re willing to give me some feedback about Care Opinion Canada.

*<Go through info letter and consent form, emphasizing anonymity and that participation is voluntary>*

I do have some questions prepared here, to keep me on track and remind me of what I want to talk about with you, but I also would like to keep this pretty informal. There are no right or wrong answers to any of the questions I ask. I’m just interested in your perspectives and your honest feedback, which will look different for everyone.

Are you ok with me audio recording our interview, just so I don’t have to write down everything you say? Your feedback is anonymous, so no one will be able to connect your responses to your name.

1. Let’s start with an introduction; How long have you been connected to Care Opinion Canada, and how did you get involved?
2. When did you first hear about Care Opinion, and what was your first impression of it?
3. Can you share your initial perspective on how the implementation of Care Opinion has gone so far?
4. From your perspective, how frequently have you observed storytellers sharing their stories on the platform?
   1. Why do you think storytellers are motivated to use Care Opinion?
   2. How often have early adopter and subscriber sites been responding to content?
5. What has been your experience so far in moderating discussions?
   1. Walk me through the moderation process; What does this look like?
   2. How closely do you collaborate with early adopter and subscriber sites in notifying them of, developing and responding to posted content?
6. Has there been anything that makes this moderation process more difficult?
   1. Why do these factors make it difficult for either storytellers or subscribers to use Care Opinion?
   2. Have you had to make any adaptations in the moderation process so far?
7. Some storytellers are attached to early adopter sites, while some are not. Have you noticed a difference in how they interact with you as a Care Opinion moderator?
   1. In your view, do storytellers still find value in sharing their stories on the platform, even if healthcare providers don't respond?
8. Does anything need to be changed to better support moderators? If so, what?
9. Is there anything else that you would like to share today, regarding Care Opinion?
