# Supplementary material
Source: Research Square preprint supplement (doi:10.21203/rs.3.rs-8928274/v1)
Supplement: Supplementary file 2 [file 68545c476ee9ad985c1575ff.docx]

**Interview Guide for Healthcare Leaders**

Thank-you so much for taking the time to chat with me today. My name is ______ and I work at the University of Alberta. We were hired independently from Care Opinion Canada to evaluate the implementation of the program.

Because I work for the university, I always have to get people who are chatting with me to take a look at an information letter that describes what I will be asked and how it will be used, and to sign a consent form that says you’re willing to give me some feedback about Care Opinion Canada.

*<Go through info letter and consent form, emphasizing anonymity and that participation is voluntary>*

I do have some questions prepared here, to keep me on track and remind me of what I want to talk about with you, but I also would like to keep this pretty informal. There are no right or wrong answers to any of the questions I ask. I’m just interested in your perspectives and your honest feedback, which will look different for everyone.

Are you ok with me audio recording our interview, just so I don’t have to write down everything you say? Your feedback is anonymous, so no one will be able to connect your responses to your name.

1. Let’s start with an introduction: What is your name, what is your role, and how did you become connected to Imagine Citizens Network?
2. When did you first hear about Care Opinion, and what was your first impression of it?
3. Do you think that when people share their experiences on Care Opinion, it will bring about any benefits? Either to patients, healthcare providers, or the larger healthcare system?
4. Since Care Opinion has been piloted at six early adopter sites so far, how do you see its potential for being used more widely as a provincial tool across healthcare sites?
5. Do you anticipate any challenges or difficulties with wide-scale implementation, and what factors might contribute to this?
6. Alternatively, are there any factors or strategies that you think could facilitate patients and providers engaging Alberta with Care Opinion more easily?
7. Is there anything else that you would like to share today, regarding Care Opinion?
