# Supplementary material
Source: Research Square preprint supplement (doi:10.21203/rs.3.rs-8928274/v1)
Supplement: Supplementary file 3 [file 73668e92c8dd6cea034e5362.docx]

**Interview Guide for Subscribers**

Thank-you so much for taking the time to chat with me today. My name is ______ and I work at the University of Alberta. We were hired independently by Care Opinion Canada to evaluate the implementation of the program, so I don’t work for Care Opinion Canada or the Imagine Citizens Network, which is running Care Opinion Canada.

I always have to get people who are chatting with me to take a look at an information letter that describes what I will be asked and how it will be used, and to sign a consent form that says you’re willing to give me some feedback about Care Opinion Canada.

*<Go through info letter and consent form, emphasizing anonymity and that participation is voluntary>*

I do have some questions prepared here, to keep me on track and remind me of what I want to talk about with you, but I also would like to keep this pretty informal. There are no right or wrong answers to any of the questions I ask. I’m just interested in your perspectives and your honest feedback, which will look different for everyone.

Are you ok with me audio recording our interview, just so I don’t have to write down everything you say? Your feedback is anonymous, so no one will be able to connect your responses to your name.

1. Let’s start with an introduction; what is your role? And how long have you been working in this role at [name of early adopter or subscriber site]?
2. When did you first hear about Care Opinion Canada?
   1. What was your initial impression of Care Opinion when it was first introduced to you?
3. Why did you decide to adopt Care Opinion Canada at your site?
   1. What do you hope to achieve by using Care Opinion Canada?
   2. Do you think that using Care Opinion Canada can bring about any benefits, either to patients, you, or your site?
4. How has your experience been with using the platform so far?
   1. Have you been able to incorporate use of the site into regular clinical practices?
   2. Have there been any challenges or barriers?
   3. If so, what strategies or approaches have helped to address these challenges?
   4. Is there anything that could reduce these barriers and make it easier for you to use Care Opinion?
5. From what you’ve seen, are patients using Care Opinion to share their healthcare experiences?
   1. Are you using any strategies to promote use of the platform among patients?
6. Have you used Care Opinion yet, to respond to patients?
   1. If yes; how often have you used it? What was it like to respond to patients?
   2. If no; why have you not used it yet? Do you plan to use it?
7. In what ways have you used stories posted on Care Opinion?
   1. Have you shared positive feedback with colleagues?
   2. Have you used feedback as learning opportunities?
8. Do you think that peoples’ use of Care Opinion helps to prioritize the voices and experiences of patients in Canada’s healthcare system?
9. Do you think that Care Opinion helps to promote connection between patients, healthcare providers, and the larger healthcare system? Why or why not?
10. Do you think that healthcare providers will use stories shared on Care Opinion to help inform their practices?
11. Is there anything else that you would like to share today, regarding Care Opinion?
