# Supplementary material
Source: Research Square preprint supplement (doi:10.21203/rs.3.rs-8928274/v1)
Supplement: Supplementary file 4 [file a2486920516ca7efb616182f.docx]

**Focus Group for Implementation/Evaluation Committee**

Thank-you so much for taking the time to chat with me today. My name is ______ and I work at the University of Alberta. As you probably already know, we were hired independently to help evaluate the implementation of Care Opinion.

I always have to get people who are chatting with me to take a look at an information letter that describes what I will be asked and how it will be used, and to sign a consent form that says you’re willing to give me some feedback about Care Opinion Canada.

*<Go through info letter and consent form, emphasizing anonymity and that participation is voluntary>*

I do have some questions prepared here, to keep us on track, but I also would like to keep this pretty informal. There are no right or wrong answers and I’m just interested in your perspectives and your honest feedback, which will look different for everyone.

Are you ok with me audio recording our focus group, so I don’t have to write down everything? Your feedback is anonymous, so no one will be able to connect your responses to your name.

1. Let’s start by going around the circle and introducing ourselves briefly: What is your name, what is your role at Imagine Citizens Network and how long have you been a part of the network, and do you wear any hats in roles outside of the network?
2. Before we dive into more in-depth questions, let’s go around and share one word that describes how you feel the rollout of Care Opinion has gone so far.
3. To start, can you share how you found early adopter sites to pilot Care Opinion?
   1. What was the readiness of these early adopter sites to start using Care Opinion? What made them ready to start using Care Opinion?
   2. Do you think other sites will feel similarly ready to use Care Opinion? What kinds of factors might influence whether a site feels ready or hesitant to use it?
4. Have you had any observations so far on how storytellers and subscribers are using Care Opinion at early adopter sites?
   1. Have there been any immediate barriers or challenges?
   2. Are storytellers and subscribers using Care Opinion more or less than expected, or in different ways than expected?
5. Can you describe any strategies or approaches that have facilitated the use of Care Opinion, for storytellers and subscribers?
   1. How have these strategies/approaches facilitated use of Care Opinion?
   2. Do you think these strategies and approaches could also work at other adopter sites? Are there any unique factors about certain sites that might shape how they are used?
6. Are you aware of any challenges or difficulties in using Care Opinion, for storytellers and subscribers?
   1. Why have these factors made it more challenging to implement or use Care Opinion?
   2. Do you feel there was enough funding and resources to support the implementation?
7. In response to these facilitators and barriers, did you find yourself needing to make any quick adjustments or changes during the implementation process?
   1. If you had the opportunity to go back, is there anything you would adapt or do differently in your implementation process, especially when thinking about applying it in future sites?
8. Is there anything else that you would like to share today, regarding Care Opinion?
